# Supplementary material for: ZnFe2O4 nanofibers decorated with NiCo2O4 nanosheets as an efficient electrocatalyst for the oxygen evolution reaction
Source: Royal Society of Chemistry journal article supplement (doi:10.1039/d3nj04318e), 2023-01-01
Supplement: d3nj04318e1.pdf [file d3nj04318e1.pdf]

## Supporting Information

### **NiCo<sub>2</sub>O<sub>4</sub> Nanosheets Decorated ZnFe<sub>2</sub>O<sub>4</sub> Nanofibers as an Efficient Electrocatalyst for Oxygen Evolution Reaction**

Xianchun Liu,<sup>†</sup> Yan Xing<sup>\*†</sup>

<sup>†</sup>Department of Chemistry, Northeast Normal University, 5268 Renmin Street,  
Changchun 130024, China

Corresponding Authors

\*E-mail: xingy202@nenu.edu.cn

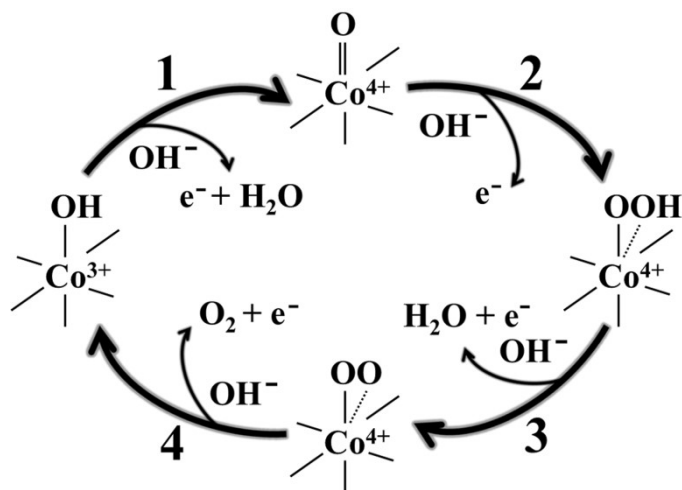

**Figure S1.** The reaction mechanism of NCO/ZFO composite for OER in 0.1 M KOH electrolyte.

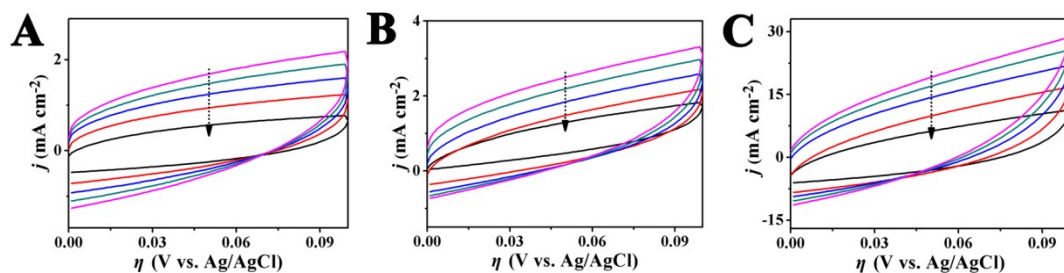

**Figure S2.** CV curves of (A) ZFO, (B) NCO and (C) NCO/ZFO composite in the potential range of 0.00 to 0.10 V vs. Ag/AgCl (non-Faradaic region) at different scan rates (20 - 100  $\text{mV s}^{-1}$ ).

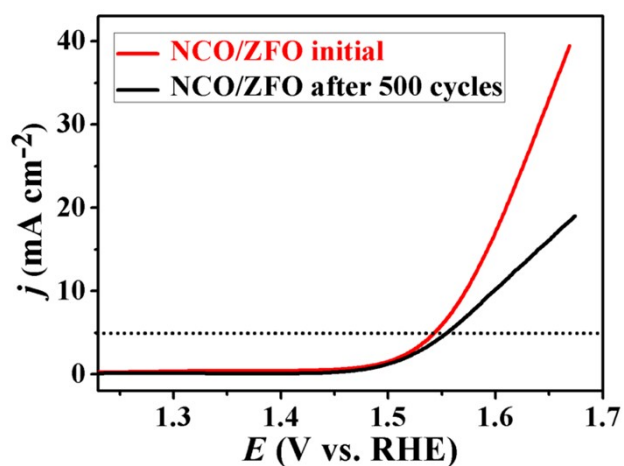

**Figure S3.** Polarization curves of NCO/ZFO composite before and after 500 cycles at  $5 \text{ mV s}^{-1}$  in 0.1 M KOH solution.

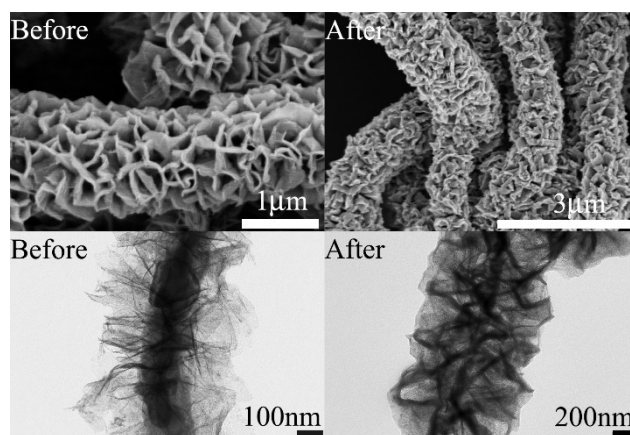

Figure S4. SEM images (Top) and TEM images (Bottom) of NCO/ZFO catalyst before and after stability test.
